# Supplementary material for: FLT1 activation in cancer cells promotes PARP-inhibitor resistance in breast cancer
Source: PubMed Central journal article supplement (PMC11319505; doi:10.1038/s44321-024-00094-2), 2024-07-02
Supplement: 44321_2024_94_MOESM1_ESM.pdf [file 44321_2024_94_MOESM1_ESM.pdf]

## **Table of Contents**

|                         |   |
|-------------------------|---|
| Appendix Figure S1..... | 2 |
| Appendix Figure S2..... | 3 |
| Appendix Table S1.....  | 4 |

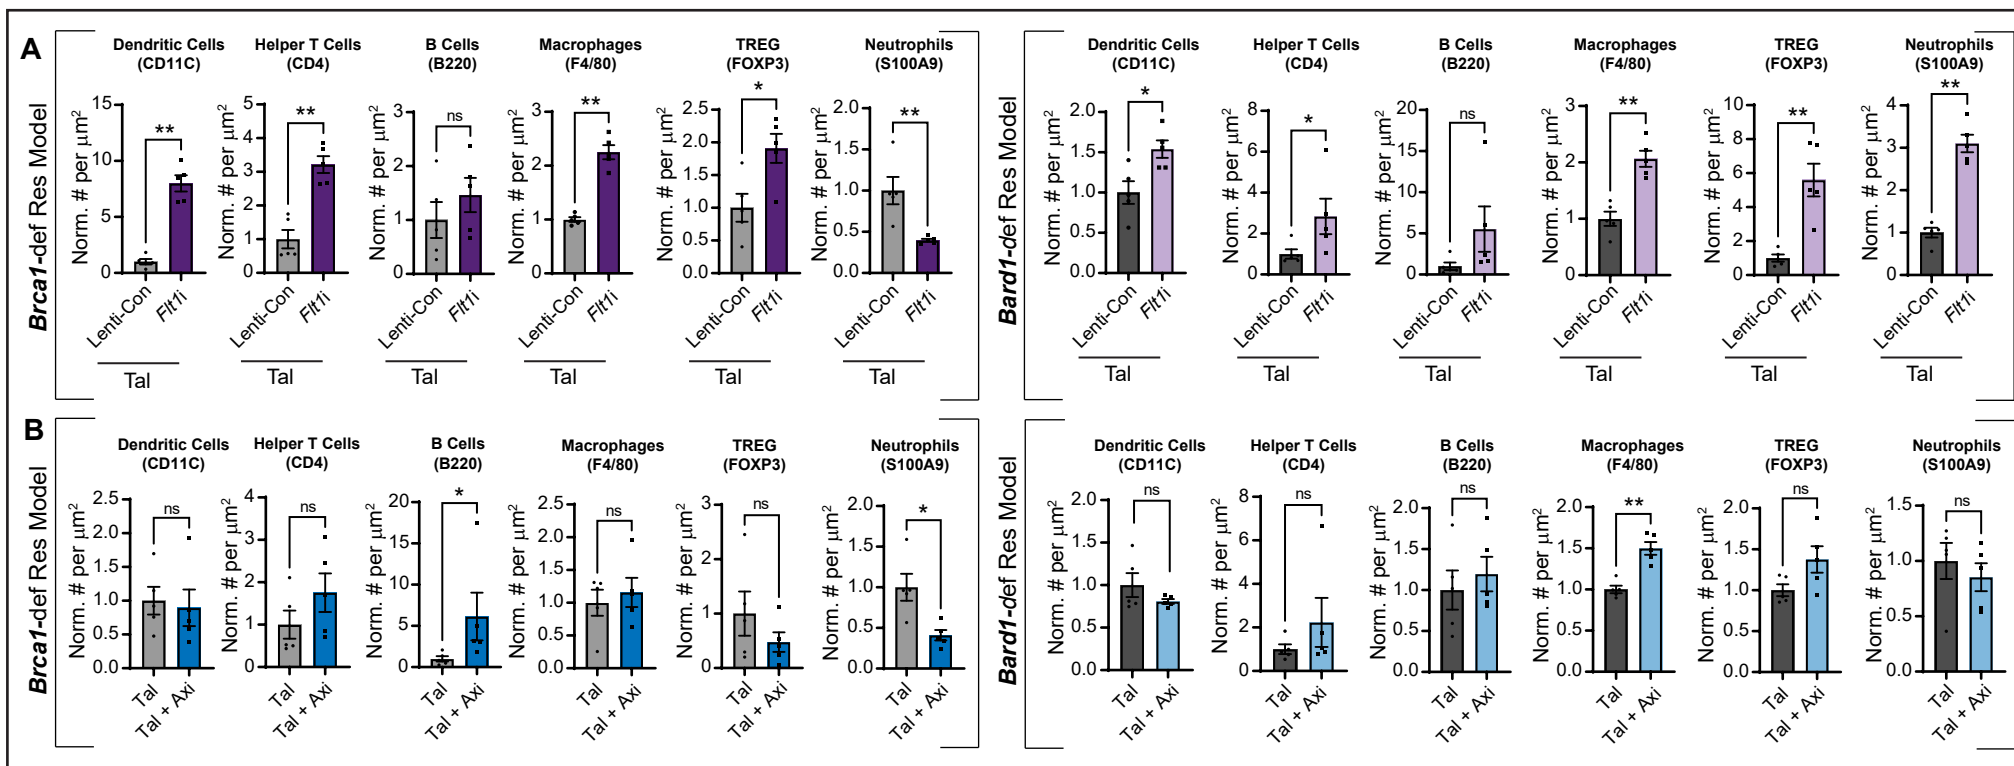

**Appendix Figure S1. Immunohistochemical analysis of the immune cells in the tumor microenvironment following FLT1 blockade and talazoparib treatment in mouse models.** **A**, Multiple immune markers were analyzed in talazoparib-resistant (“Res”) tumor sections from both *Brca1*-def and *Bard1*-def breast cancer models expressing either Lenti-Con or Flt1i and treated with talazoparib (“Tal”) (see Fig. 3C).  $n = 5$  for both groups from each model. Data are presented as mean values  $\pm$  SEM.  $P$  values were determined by a two-tailed, unpaired, Mann–Whitney test and are listed in parentheses following the immunostains analyzed: for the *Brca1*-def model, CD11C (0.0079), CD4 (0.0079), B220 (ns), F4/80 (0.0079), FOXP3 (0.0317), and S100A9 (0.0079) and for the *Bard1*-def model, CD11C (0.0317), CD4 (0.0317), B220 (ns), F4/80 (0.0079), FOXP3 (0.0079), and S100A9 (0.0079). ns: not significant. **B**, Multiple immune markers were analyzed in Res tumors from both *Brca1*-def and *Bard1*-def breast cancer models treated with Tal or Tal + axitinib (“Axi”) (see Fig. 4A/E).  $n = 5$  for both groups from each model. Data are presented as mean values  $\pm$  SEM.  $P$  values were determined by a two-tailed, unpaired, Mann–Whitney test. ns: not significant. For the *Brca1*-def model, \* indicates  $P = 0.0159$  for both quantitation for B220 and S100A9. For the *Bard1*-def model, \*\* indicates  $P = 0.0079$  for F4/80. Remaining comparisons for other immune cells were not significant (ns).

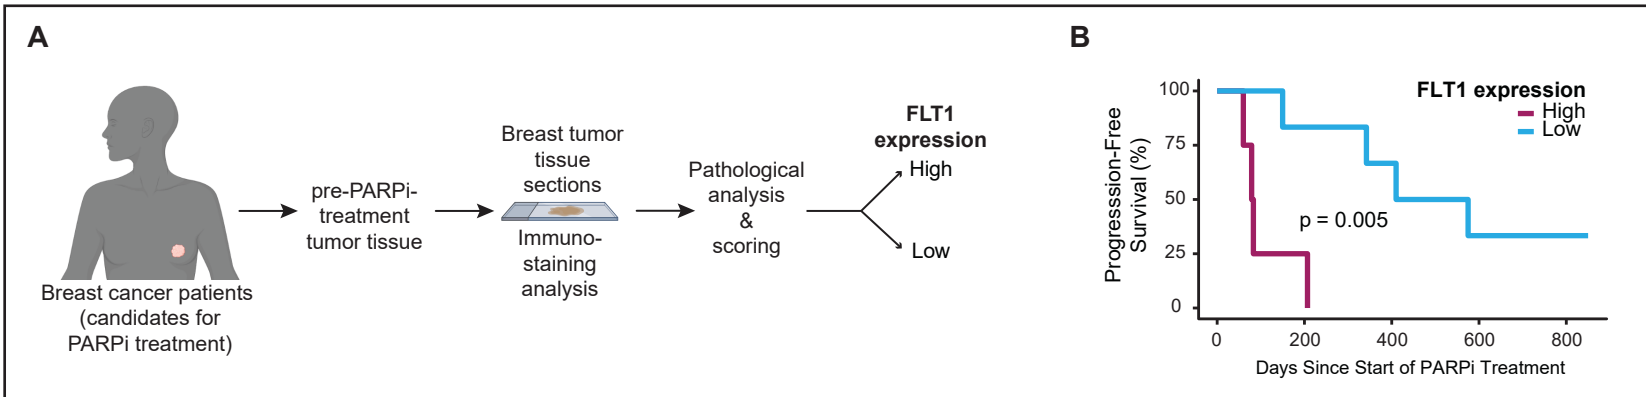

**Appendix Figure S2. High FLT1 expression in human tumor cells prior to PARPi treatment is associated with shorter progression-free survival in breast cancer patients.** **A**, Schematic representation of the workflow for the pathological evaluation of the FLT1 expression in human tumor cells in breast tumor sections pre-PARPi treatment in breast cancer patients. FLT1 immunostainings were performed on tumor tissue specimens (biopsies/resected material) from 10 patients with breast cancer and were obtained prior to PARPi treatment. The immunostained samples were scored by a pathologist who was blinded to the sample details, as either FLT1-high or -low expression. **B**, Kaplan–Meier plots for the PFS of patients described in **A**. Data were analyzed using the log-rank test:  $\chi^2 = 8.044$ , degrees of freedom (d.f.) = 1;  $P = 0.005$ ;  $n = 10$  patients.

**Appendix Table S1**

| <b>Sample ID</b> | <b>Germline Variant</b> | <b>pFLT1</b> |
|------------------|-------------------------|--------------|
| PARP 007         | BRCA1                   | High         |
| PARP 12          | BRCA1                   | Low          |
| PARP 21          | BRCA1                   | Low          |
| PARP 50          | BRCA2                   | Low          |
| S19-30556        | PALB2                   | Low          |
| S19-46410        | BRCA2                   | High         |
| S19-713          | BRCA2                   | Low          |
| S18-73798        | BRCA2                   | High         |
| S19-15838        | BRCA1                   | High         |
| S17-58773        | BRCA2                   | High         |

**Appendix Table S1.**

De-identified list of tumor tissue samples from human breast cancer patients ( $n = 10$ ) with confirmed *BRCA1/2* or *PALB2* germline mutations, along with high or low levels of pFLT1. Samples were collected prior to PARP inhibitor treatment.
